# Supplementary material for: Panapophenanthrin, a Rare Oligocyclic Diterpene from Panus strigellus
Source: MDPI journal article supplement (doi:10.3390/metabo13070848), 2023-07-13
Supplement: s1 [file s1]

Supplementary Materials for

**Panapophenanthrin, a rare oligocyclic diterpene from *Panus strigellus***

Natalia A. Llanos-López <sup>1,2</sup>, Sherif Saeed Ebada <sup>1,3,\*</sup> Aida M. Vasco-Palacios <sup>4</sup>, Laura M. Sánchez-Giraldo <sup>5</sup>, Lina López <sup>6</sup>, Luisa F. Rojas <sup>6</sup> Attila Mándi <sup>7</sup>, Tibor Kurtán <sup>7</sup> and Yasmina Marin-Felix <sup>1,2,\*</sup>

<sup>1</sup> Department of Microbial Drugs, Helmholtz Centre for Infection Research (HZI) and German Centre for Infection Research (DZIF), DZIF Partner Site Hannover-Braunschweig, Inhoffenstrasse 7, 38124 Braunschweig, Germany

<sup>2</sup> Institute of Microbiology, Technische Universität Braunschweig, Spielmannstraße 7, 38106 Braunschweig, Germany

<sup>3</sup> Department of Pharmacognosy, Faculty of Pharmacy, Ain Shams University, Cairo 11566, Egypt

<sup>4</sup> Grupo de Microbiología Ambiental and BioMicro, Escuela de Microbiología, Universidad de Antioquia, Calle 70 No. 52-21, 050010 Medellin, Colombia

<sup>5</sup> Grupo de Investigación de Biotecnología Industrial, Facultad de Ciencias, Universidad Nacional de Colombia Sede Medellín, Calle 59A No. 63-20, 050034 Medellin, Colombia

<sup>6</sup> Grupo de Biotransformación, Escuela de Microbiología, Universidad de Antioquia, Calle 70 No. 52-21, 050010 Medellin, Colombia

<sup>7</sup> Department of Organic Chemistry, University of Debrecen, P. O. Box 400, 4002 Debrecen, Hungary

\*Correspondence: [sherif.elsayed@helmholtz-hzi.de](mailto:sherif.elsayed@helmholtz-hzi.de); [sherif\\_elsayed@pharma.asu.edu.eg](mailto:sherif_elsayed@pharma.asu.edu.eg) (S.S.E); [yasmina.marinfelix@helmholtz-hzi.de](mailto:yasmina.marinfelix@helmholtz-hzi.de) (Y.M.-F.)

**ABSTRACT**

During the course of our search for biologically active secondary metabolites from fungal cultures, a new oligocyclic diterpenoidal derivative, panapophenanthrin (**1**), was isolated from *Panus strigellus*. In addition, two known metabolites, panepophenanthrin (**2**) and dihydrohypnophilin (**3**), were also obtained. The chemical structures of the isolated compounds were elucidated based on extensive 1D and 2D NMR spectral analyses together with high-resolution electrospray ionization mass spectrometry (HR-ESI-MS). The absolute configuration was determined through TDDFT-ECD calculations. All of the compounds were assessed for their antimicrobial and cytotoxic activities. Compounds **1** and **3** showed moderate to weak activities in the performed antimicrobial assays, while compound **1** exhibited potent cytotoxic activity against the mammalian cell lines mouse fibroblast (L929) and human endocervical adenocarcinoma (KB3.1).

**Keywords:** Basidiomycota; antimicrobial; cytotoxicity; secondary metabolites; white rot fungi.

## Contents of Supporting Information

| #         | Contents                                                                                                                                 | Page       |
|-----------|------------------------------------------------------------------------------------------------------------------------------------------|------------|
| <b>1</b>  | Table S1. $^1\text{H}$ and $^{13}\text{C}$ NMR data of panepophenanthrin ( <b>2</b> ).                                                   | <b>S4</b>  |
| <b>2</b>  | Table S2. $^1\text{H}$ and $^{13}\text{C}$ NMR data of dihydrohynophilin ( <b>3</b> ).                                                   | <b>S4</b>  |
| <b>3</b>  | Figure S1. HPLC chromatogram and LRESIMS spectrum of <b>1</b> .                                                                          | <b>S5</b>  |
| <b>4</b>  | Figure S2. HPLC chromatogram and HRESIMS spectrum of <b>1</b> .                                                                          | <b>S6</b>  |
| <b>5</b>  | Figure S3. $^1\text{H}$ NMR spectrum of <b>1</b> in chloroform- <i>d</i> at 500 MHz.                                                     | <b>S7</b>  |
| <b>6</b>  | Figure S4. $^1\text{H}$ - $^1\text{H}$ COSY spectrum of <b>1</b> in chloroform- <i>d</i> at 500 MHz.                                     | <b>S8</b>  |
| <b>7</b>  | Figure S5. HMBC spectrum of <b>1</b> in chloroform- <i>d</i> at 500 MHz.                                                                 | <b>S9</b>  |
| <b>8</b>  | Figure S6. HSQC spectrum of <b>1</b> in chloroform- <i>d</i> at 500 MHz.                                                                 | <b>S10</b> |
| <b>9</b>  | Figure S7. $^1\text{H}$ NMR spectrum of <b>1</b> in methanol- <i>d</i> <sub>4</sub> :acetone- <i>d</i> <sub>6</sub> (3:1) at 500 MHz.    | <b>S11</b> |
| <b>10</b> | Figure S8. $^{13}\text{C}$ NMR spectrum of <b>1</b> in methanol- <i>d</i> <sub>4</sub> :acetone- <i>d</i> <sub>6</sub> (3:1) at 125 MHz. | <b>S12</b> |
| <b>11</b> | Figure S9. HMBC spectrum of <b>1</b> in methanol- <i>d</i> <sub>4</sub> :acetone- <i>d</i> <sub>6</sub> (3:1) at 500 MHz.                | <b>S13</b> |
| <b>12</b> | Figure S10. HSQC spectrum of <b>1</b> in methanol- <i>d</i> <sub>4</sub> :acetone- <i>d</i> <sub>6</sub> (3:1) at 500 MHz.               | <b>S14</b> |
| <b>13</b> | Figure S11. ROESY spectrum of <b>1</b> in methanol- <i>d</i> <sub>4</sub> :acetone- <i>d</i> <sub>6</sub> (3:1) at 500 MHz.              | <b>S15</b> |
| <b>14</b> | Figure S12. Flow chart of the purification procedure.                                                                                    | <b>S16</b> |

Table S1. <sup>1</sup>H and <sup>13</sup>C NMR data of panepophenanthrin (2).

| pos.  | δ <sub>H</sub> (multi, <i>J</i> [Hz]) <sup>a</sup> | δ <sub>C</sub> , type <sup>b</sup> |
|-------|----------------------------------------------------|------------------------------------|
| 1     | 4.21 (br s, 1H)                                    | 66.7, CH                           |
| 2     | 3.38 (t, <i>J</i> = 3.5 Hz, 1H)                    | 55.5, CH                           |
| 3     | 3.23 (d, <i>J</i> = 4.1 Hz, 1H)                    | 55.7, CH                           |
| 3a    |                                                    | 101.0, C                           |
| 5     |                                                    | 76.3, C                            |
| 5a    | 3.09 (dd, <i>J</i> = 5.2, 1.7 Hz, 1H)              | 55.8, CH                           |
| 6     | 6.64 (dd, 5.1, 2.9)                                | 138.0, CH                          |
| 6a    |                                                    | 137.0, C                           |
| 7     |                                                    | 194.2, CO                          |
| 8     | 3.44 (d, <i>J</i> = 4.1 Hz, 1H)                    | 53.0, CH                           |
| 9     | 3.79 (t, <i>J</i> = 3.5, 1H)                       | 58.9, CH                           |
| 10    | 4.45 (br s, 1H)                                    | 63.8, CH                           |
| 10a   | 2.10 (d, 10.0, 1H)                                 | 50.1, CH                           |
| 10b   | 1.79 (d, 10.0, 1H)                                 | 48.2, CH                           |
| 10c   |                                                    | 53.2, C                            |
| 11    | 5.86 (d, <i>J</i> = 16.3 Hz, 1H)                   | 127.2, CH                          |
| 12    | 5.45 (d, <i>J</i> = 16.2 Hz, 1H)                   | 140.9, CH                          |
| 13    |                                                    | 69.1, C                            |
| 14    | 1.00 (s, 3H)                                       | 29.4, CH <sub>3</sub>              |
| 15    | 1.05 (s, 3H)                                       | 30.2, CH <sub>3</sub>              |
| 16    | 1.33 (s, 3H)                                       | 25.4, CH <sub>3</sub>              |
| 17    | 1.24 (s, 3H)                                       | 31.8, CH <sub>3</sub>              |
| 1-OH  | 5.13 (d, <i>J</i> = 5.2 Hz, 1H)                    |                                    |
| 3a-OH | 5.96 (s, 1H)                                       |                                    |
| 10-OH | 4.12 (br s, 1H)                                    |                                    |
| 13-OH | 4.26 (br s, 1H)                                    |                                    |

<sup>a</sup> Measured in DMSO-*d*<sub>6</sub> at 500 MHz.<sup>b</sup> Assigned by HMBC and HSQC spectra.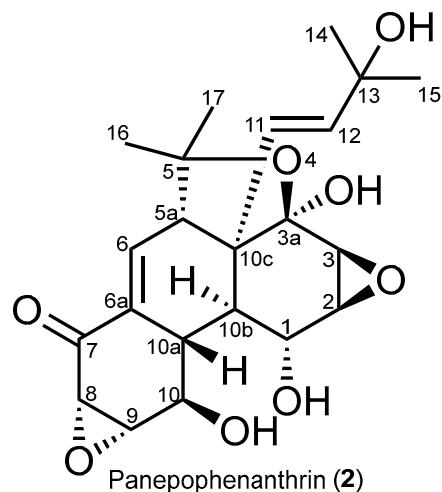Table S2. <sup>1</sup>H and <sup>13</sup>C NMR data of dihydrohynophilin (3).

| pos. | δ <sub>H</sub> (multi, <i>J</i> [Hz]) <sup>a</sup>    | δ <sub>C</sub> , type <sup>b</sup> |
|------|-------------------------------------------------------|------------------------------------|
| 1    | 3.80 (d, 8.4, 1H)                                     | 81.0                               |
| 2    | 2.02 (dd, 12.0, 8.4, 1H)                              | 55.2                               |
| 3    |                                                       | 47.7                               |
| 4    |                                                       | 159.6                              |
| 5    | 4.62 (d, 5.1, 1H)                                     | 74.2                               |
| 6    | 3.48 (s, 1H)                                          | 63.8                               |
| 7    |                                                       | 75.1                               |
| 8    | 1.83 d                                                | 30.7                               |
| 9    | 2.61 (ddt, 19.9, 10.8, 8.5, 1H)                       | 34.8                               |
| 10   | 1.83 (dd, 12.9, 8.5, 1H)<br>1.14 (dd, 12.9, 10.8, 1H) | 46.4                               |
| 11   |                                                       | 44.2                               |
| 12   | 0.88 (s, 3H)                                          | 19.8                               |
| 13   | 1.05 (s, 3H)                                          | 26.6                               |
| 14   | 1.17 (s, 3H)                                          | 17.6                               |
| 15   | 5.32 (d, 2.1, 1H)<br>5.15 (dd, 2.6, 0.8, 1H)          | 112.6                              |

<sup>a</sup> Measured in chloroform-*d* at 500 MHz.<sup>b</sup> Assigned by HMBC and HSQC spectra.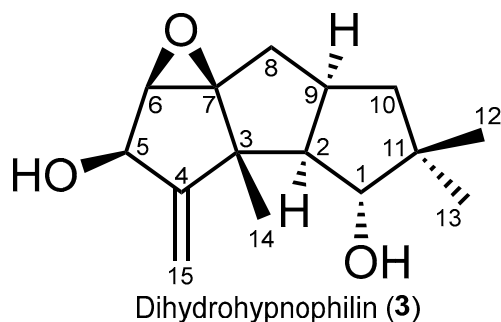

# Generic Display Report

## Analysis Info

Analysis Name S:\PEOPLE\N1121\_Natalia Llanos\Panus\Panus (F5S3R2+F8S2R2)\_F5\_F4\Amazon\Panus  
 Method F5S3R2+F8S2R2)\_F5\_F4\_BA8\_01\_39079.d  
 Sample Name Panus (F5S3R2+F8S2R2)\_F5\_F4  
 Comment  
 Acquisition Date 08.05.2022 00:09:32  
 Operator esu  
 Instrument amaZon speed

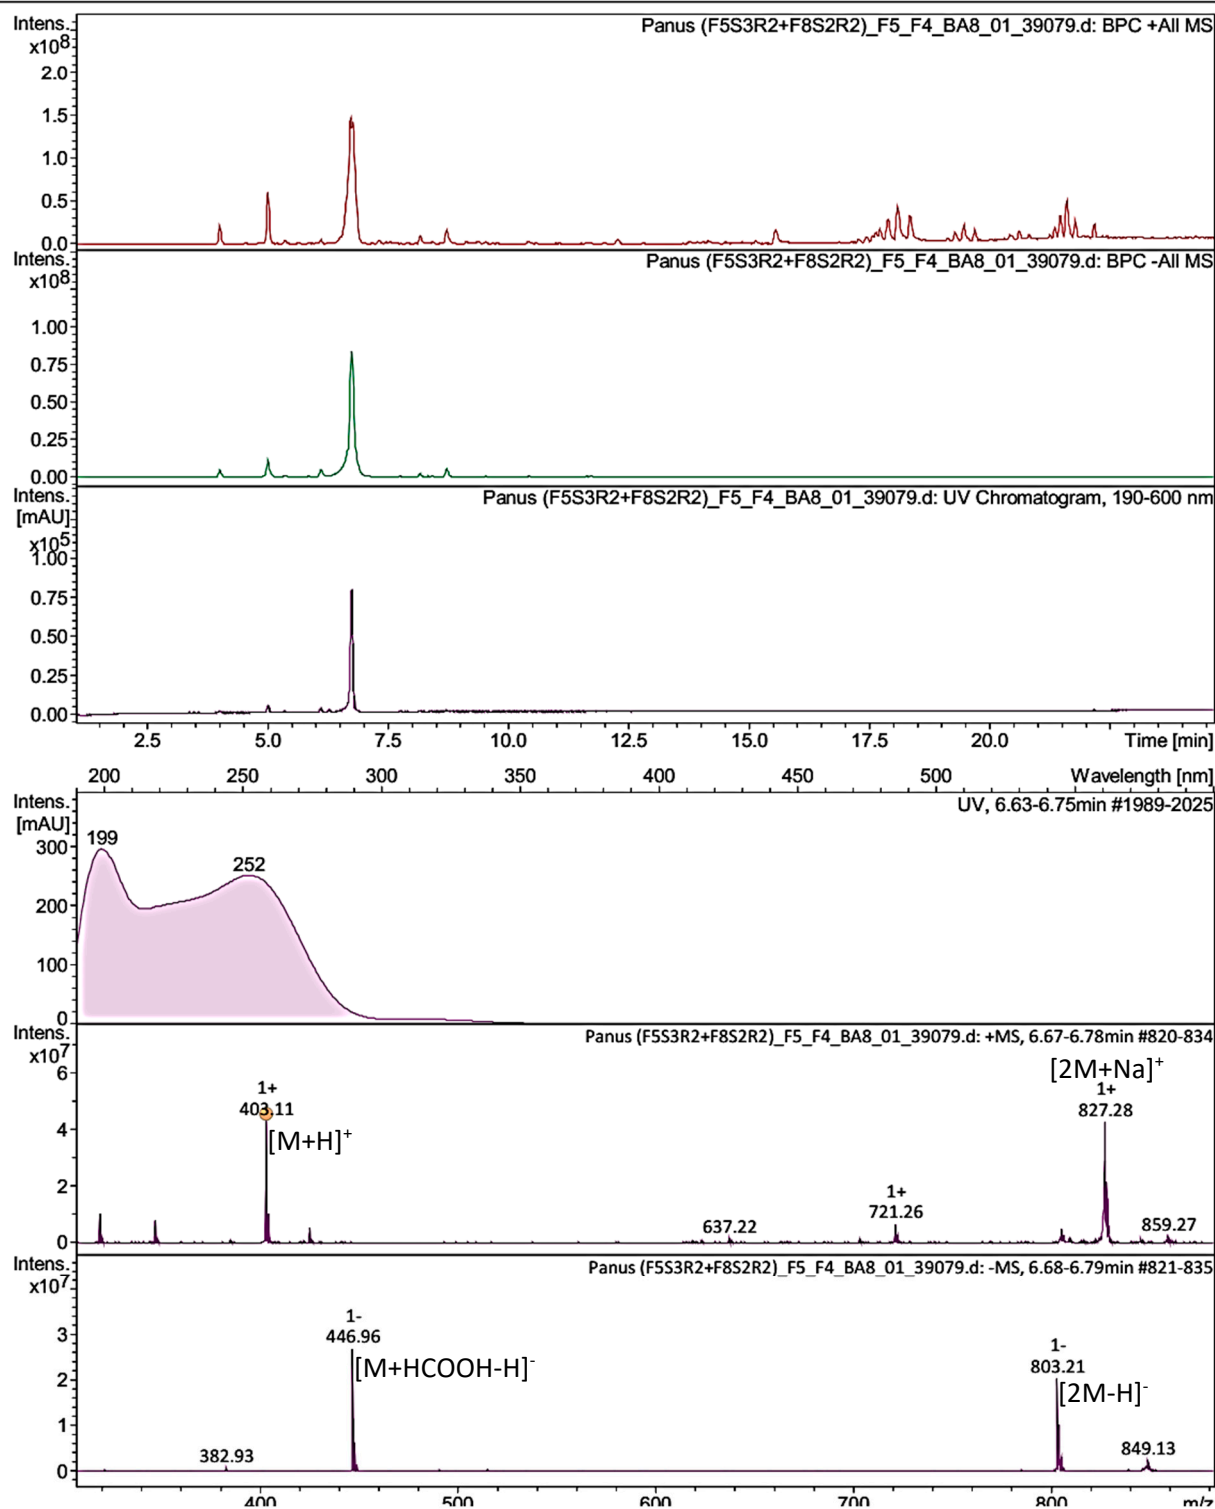

Figure S1. HPLC chromatogram and LRESIMS spectrum of 1.

# Generic Display Report

## Analysis Info

Analysis Name C:\SEL22\Panus sp\_Natalia\Panus  
 Method Panus\_F5S3R2+F8S2R2\_F5\_F4\_P1-A-4\_01\_10193.d:06  
 Sample Name Panus\_F5S3R2+F8S2R2\_F5\_F4\_P1-A-4\_01\_10193.d:06  
 Comment Screening01  
 Waters Acquity UPLC BEH C<sub>18</sub> 1,7um 2.1x50mm

Acquisition Date 19.05.2022 10:41:36

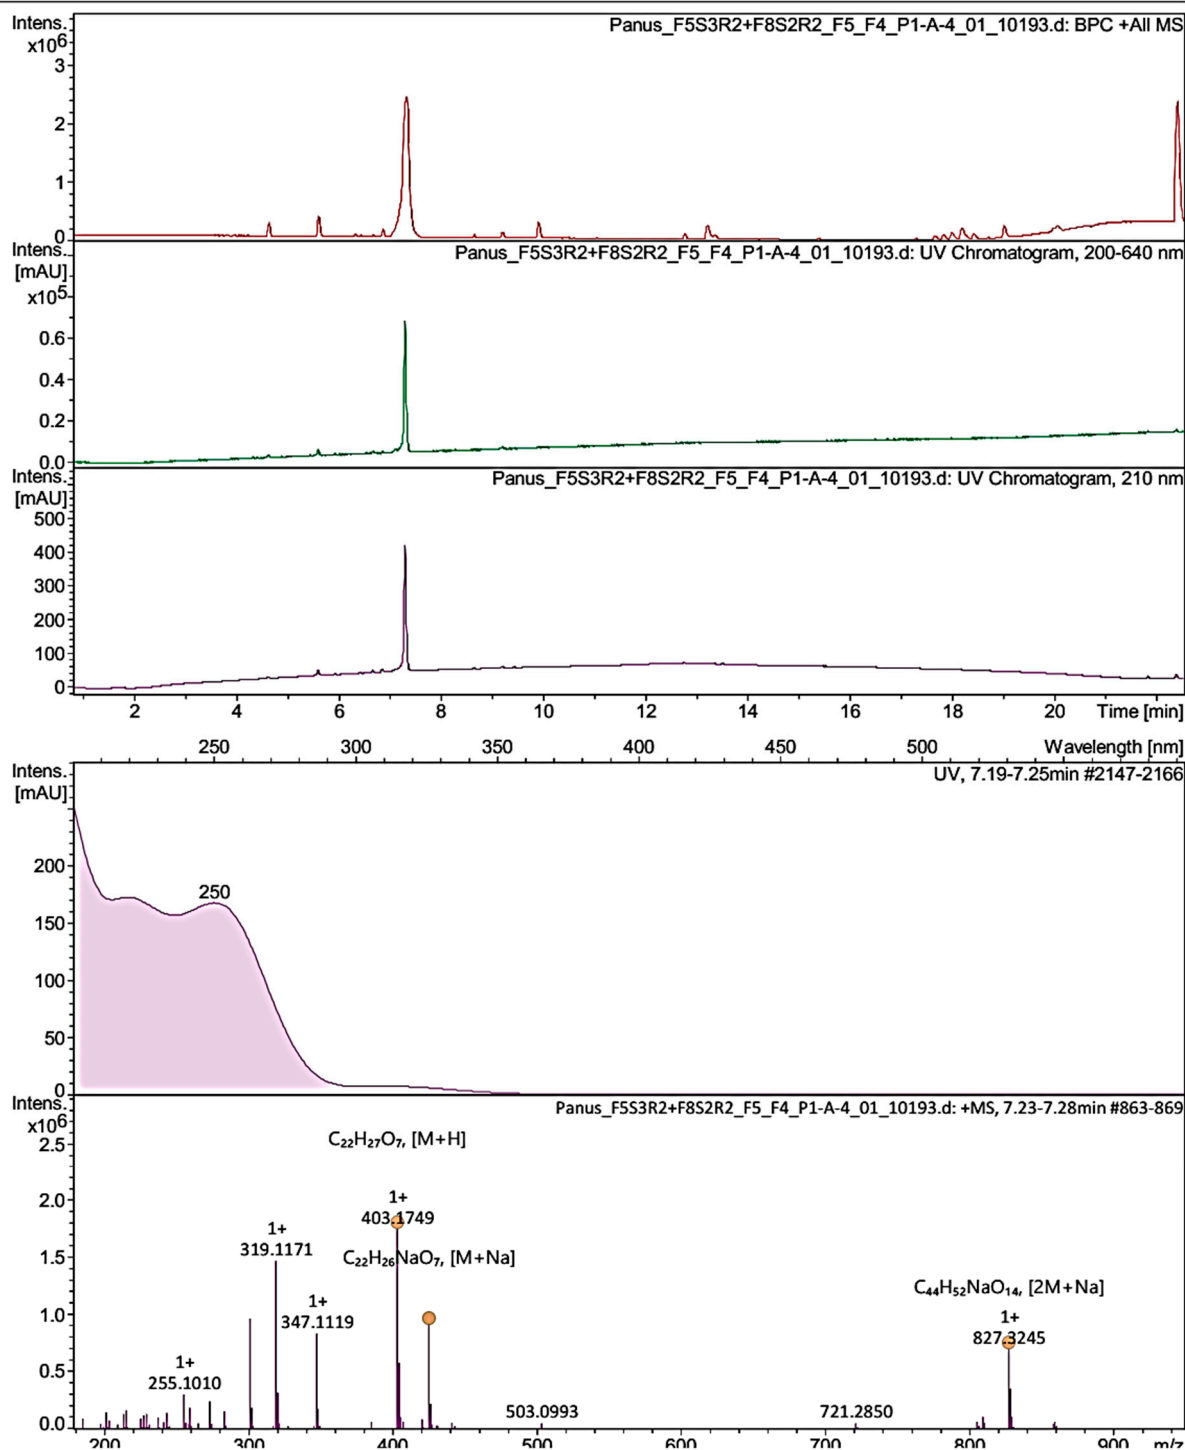

Figure S2. HPLC chromatogram and HRESIMS spectrum of 1.

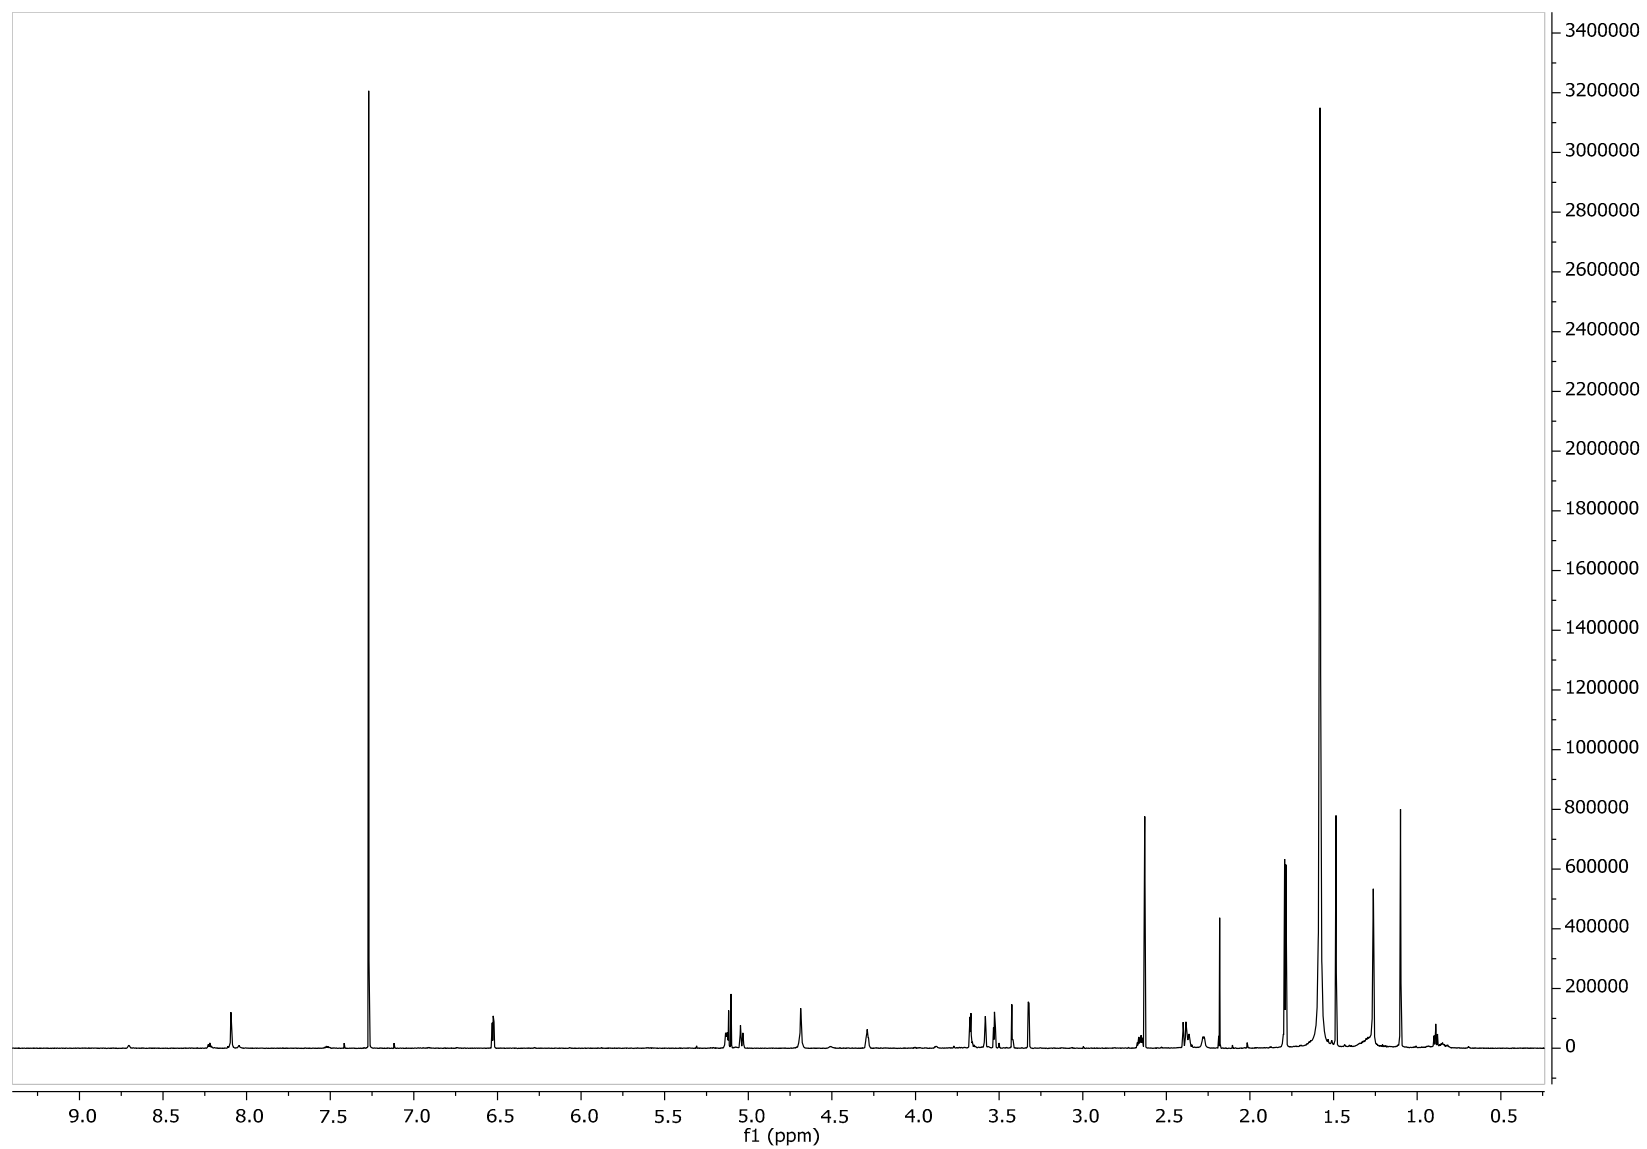

Figure S3.  $^1\text{H}$  NMR spectrum of **1** in chloroform-*d* at 500 MHz.

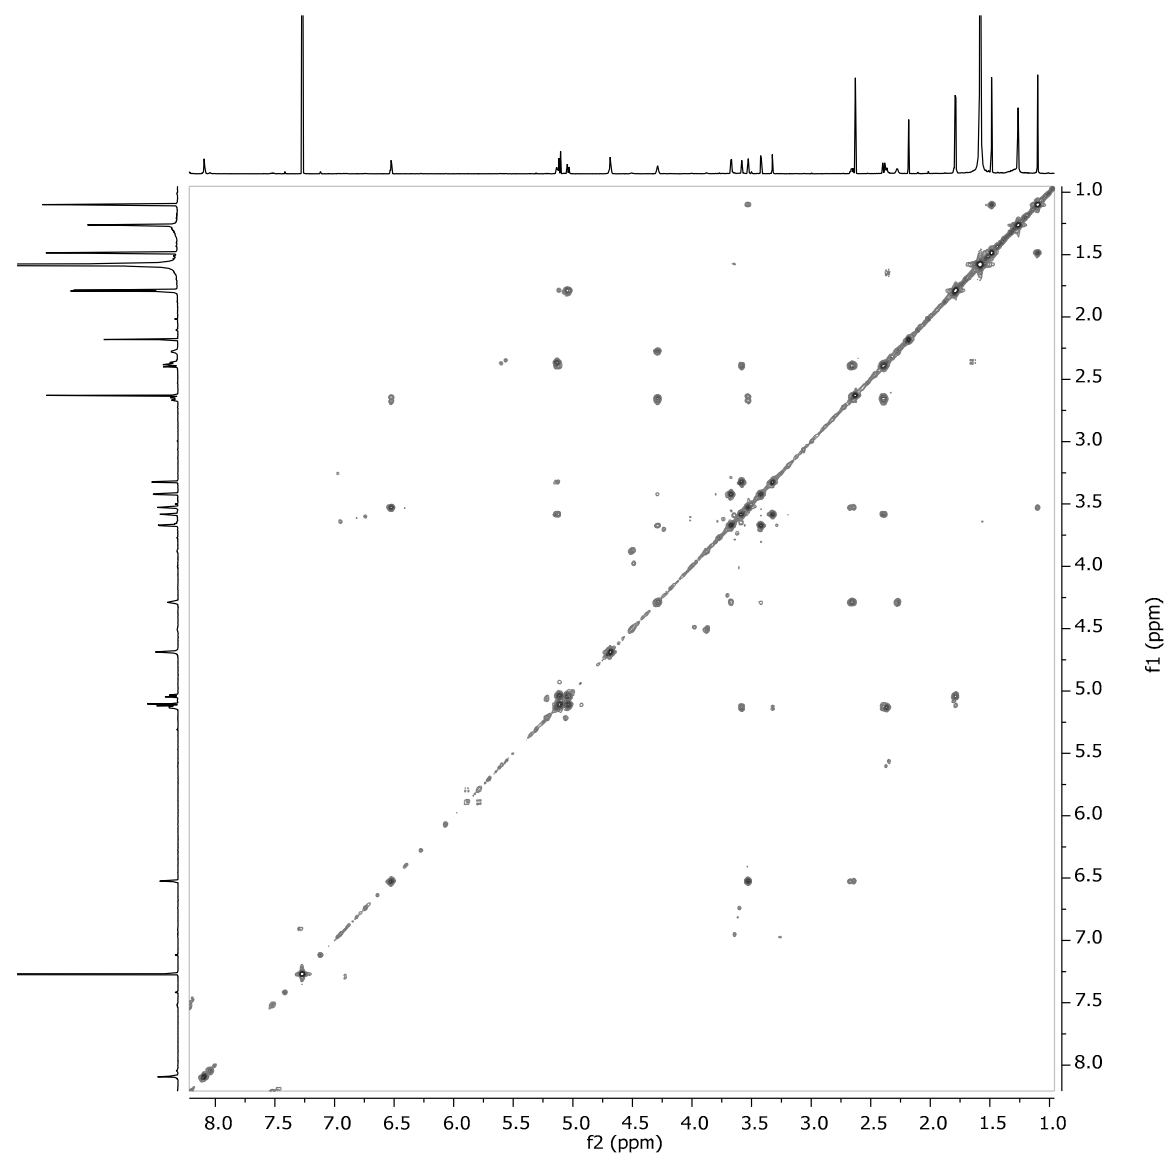

Figure S4.  $^1\text{H}$ - $^1\text{H}$  COSY spectrum of **1** in chloroform-*d* at 500 MHz.



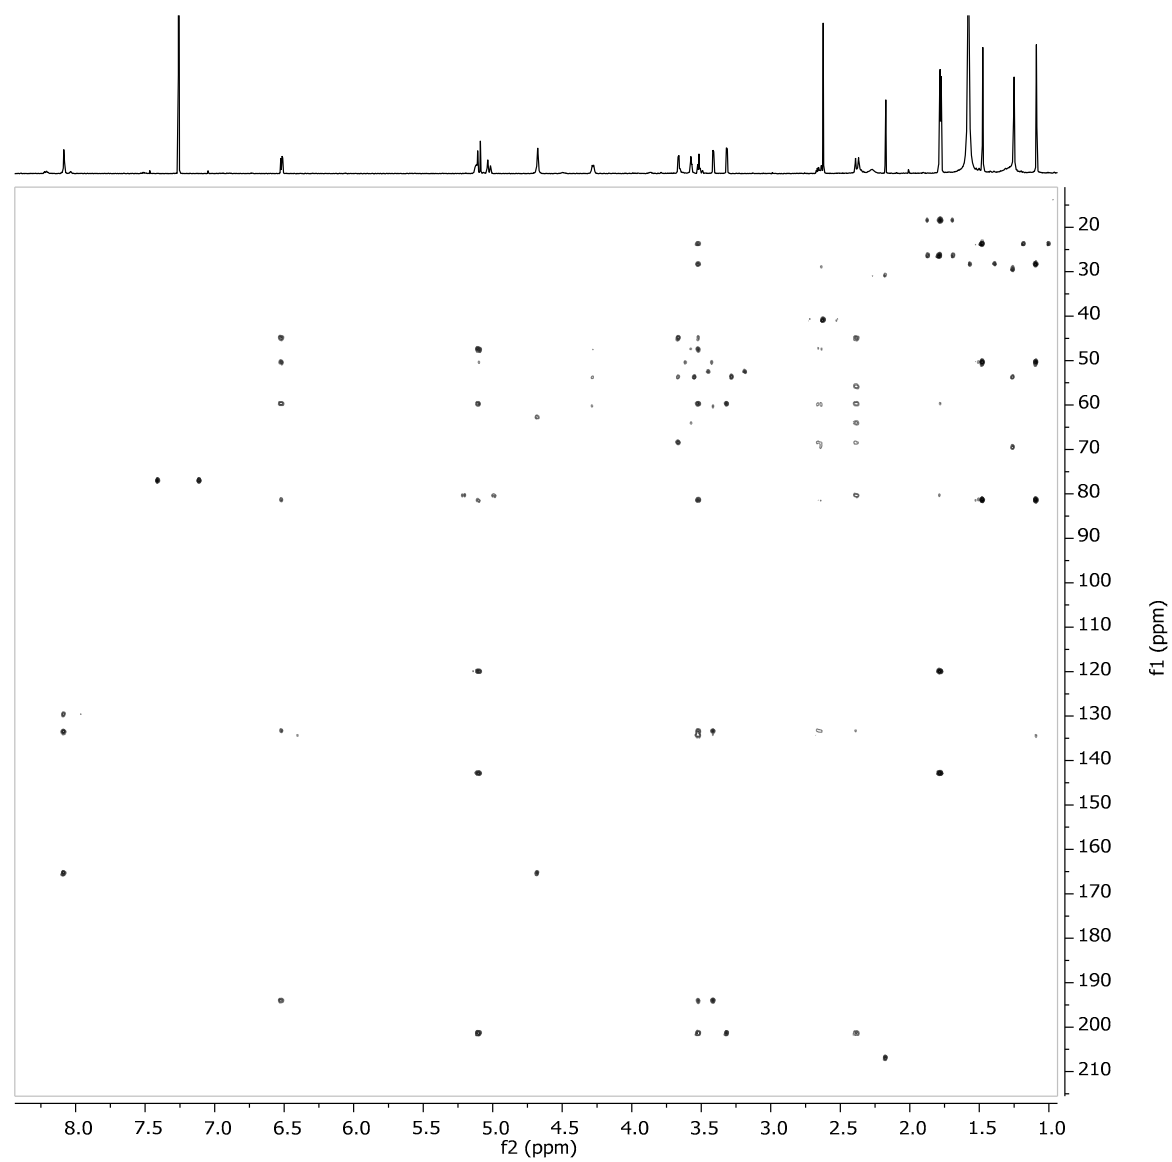

Figure S5. HMBC spectrum of **1** in chloroform-*d* at 500 MHz.

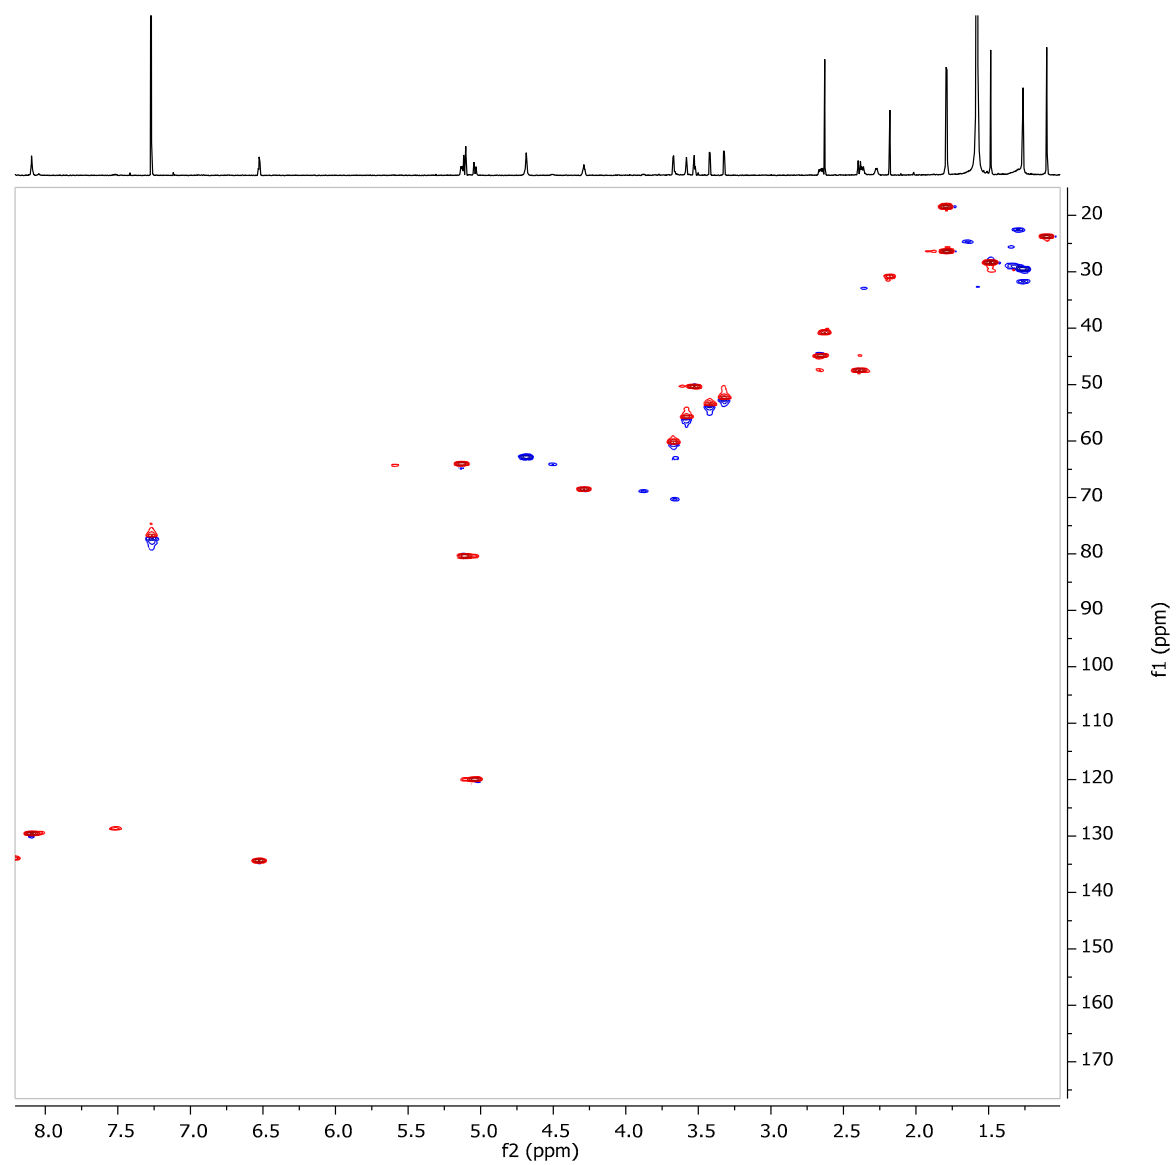

Figure S6. HSQC spectrum of **1** in chloroform-*d* at 500 MHz.

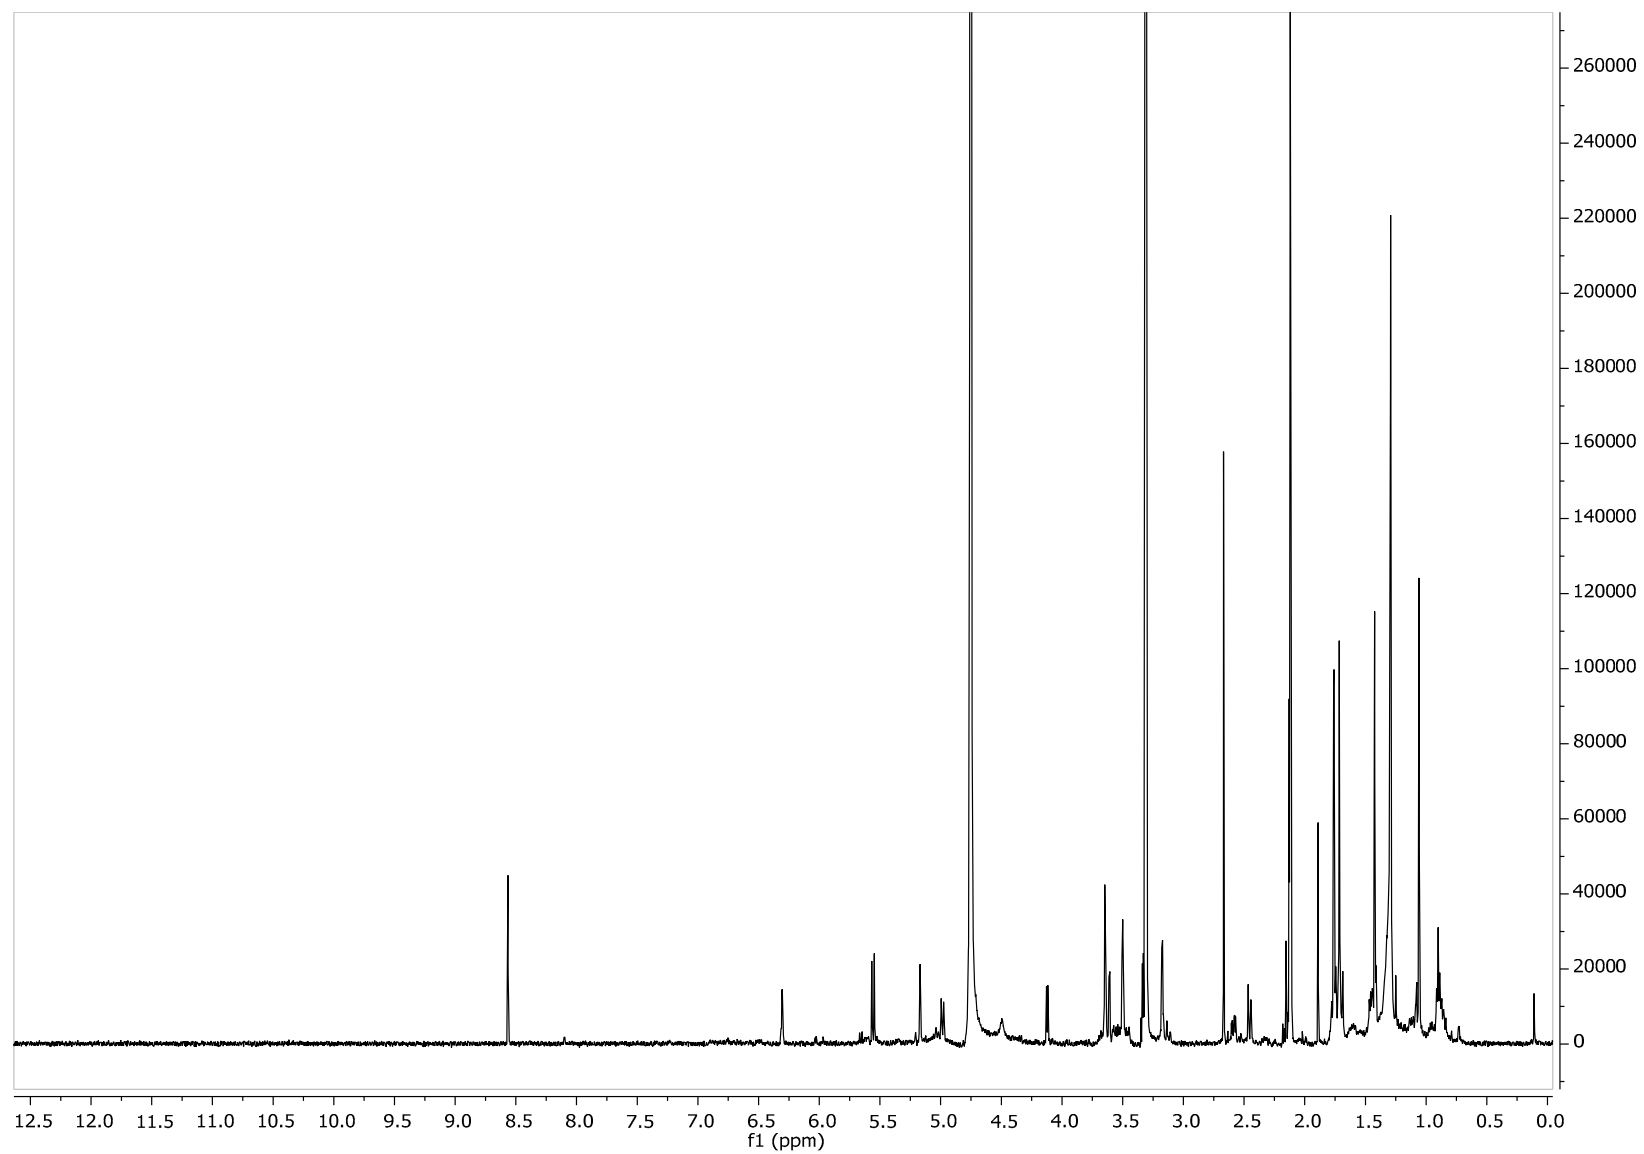

Figure S7.  $^1\text{H}$  NMR spectrum of **1** in methanol- $d_4$ :acetone- $d_6$  (3:1) at 500 MHz.

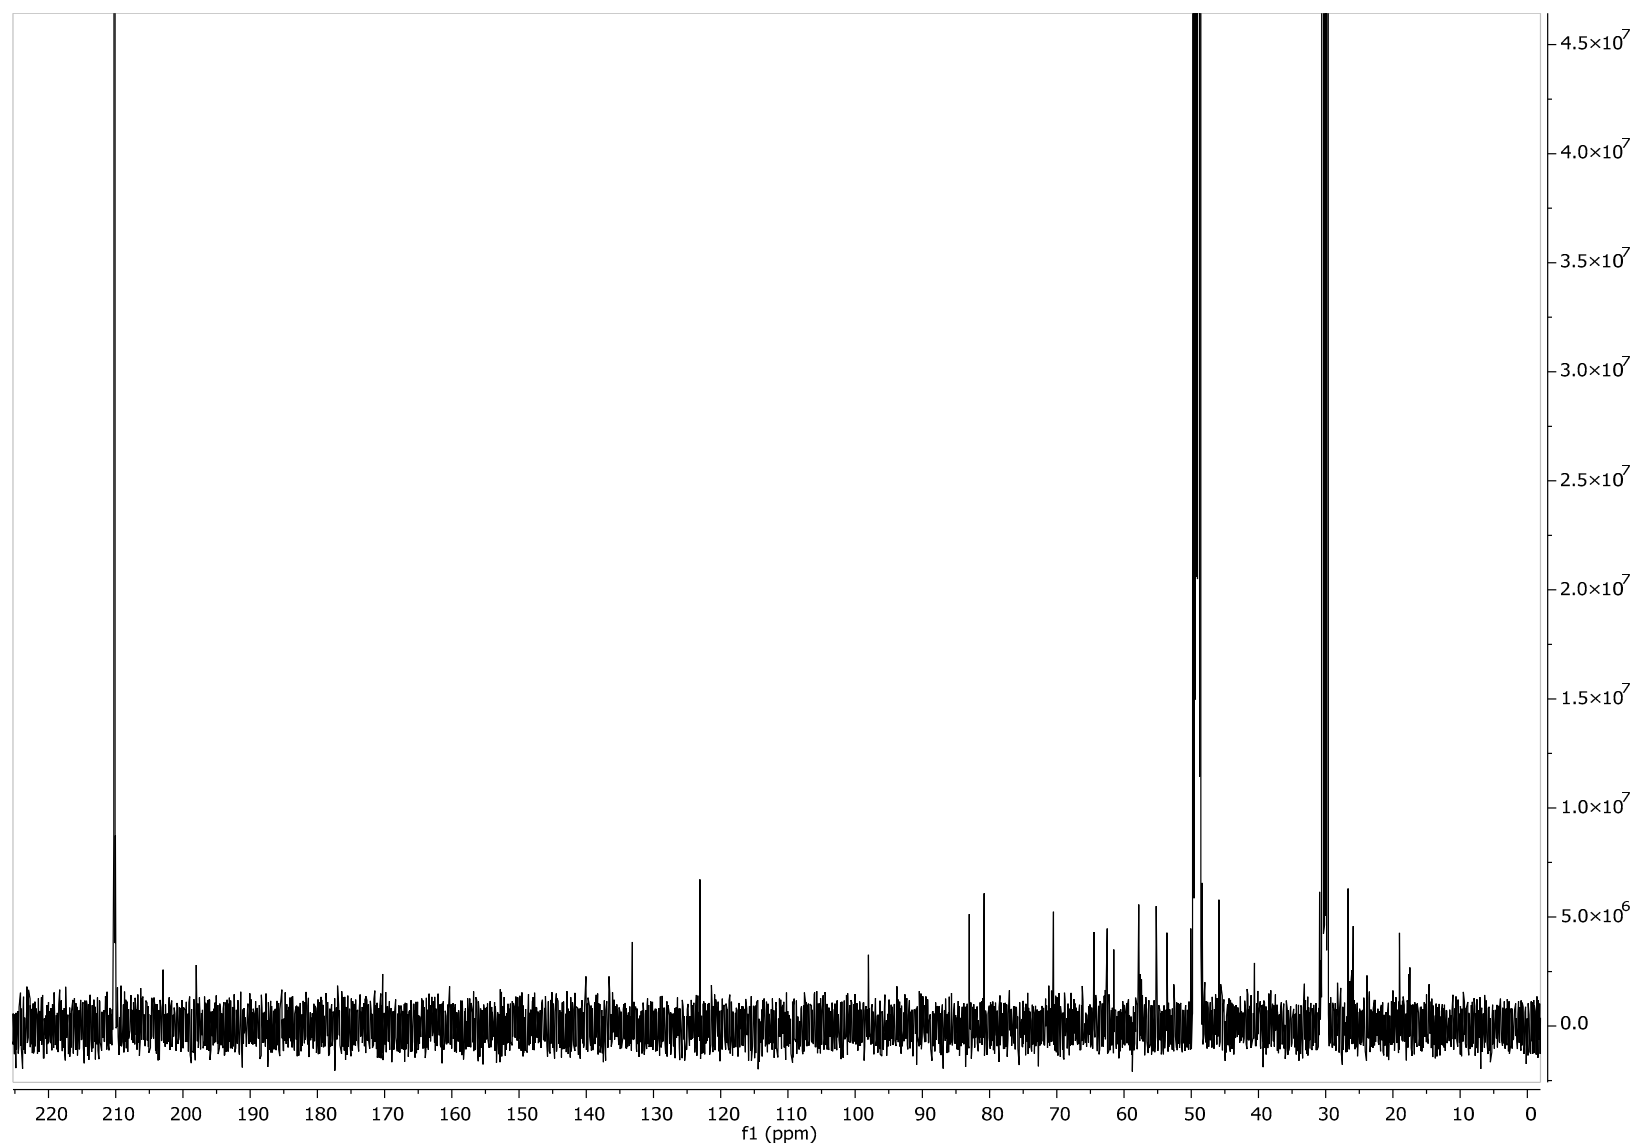

Figure S8.  $^{13}\text{C}$  NMR spectrum of **1** in methanol- $d_4$ :acetone- $d_6$  (3:1) at 125 MHz.

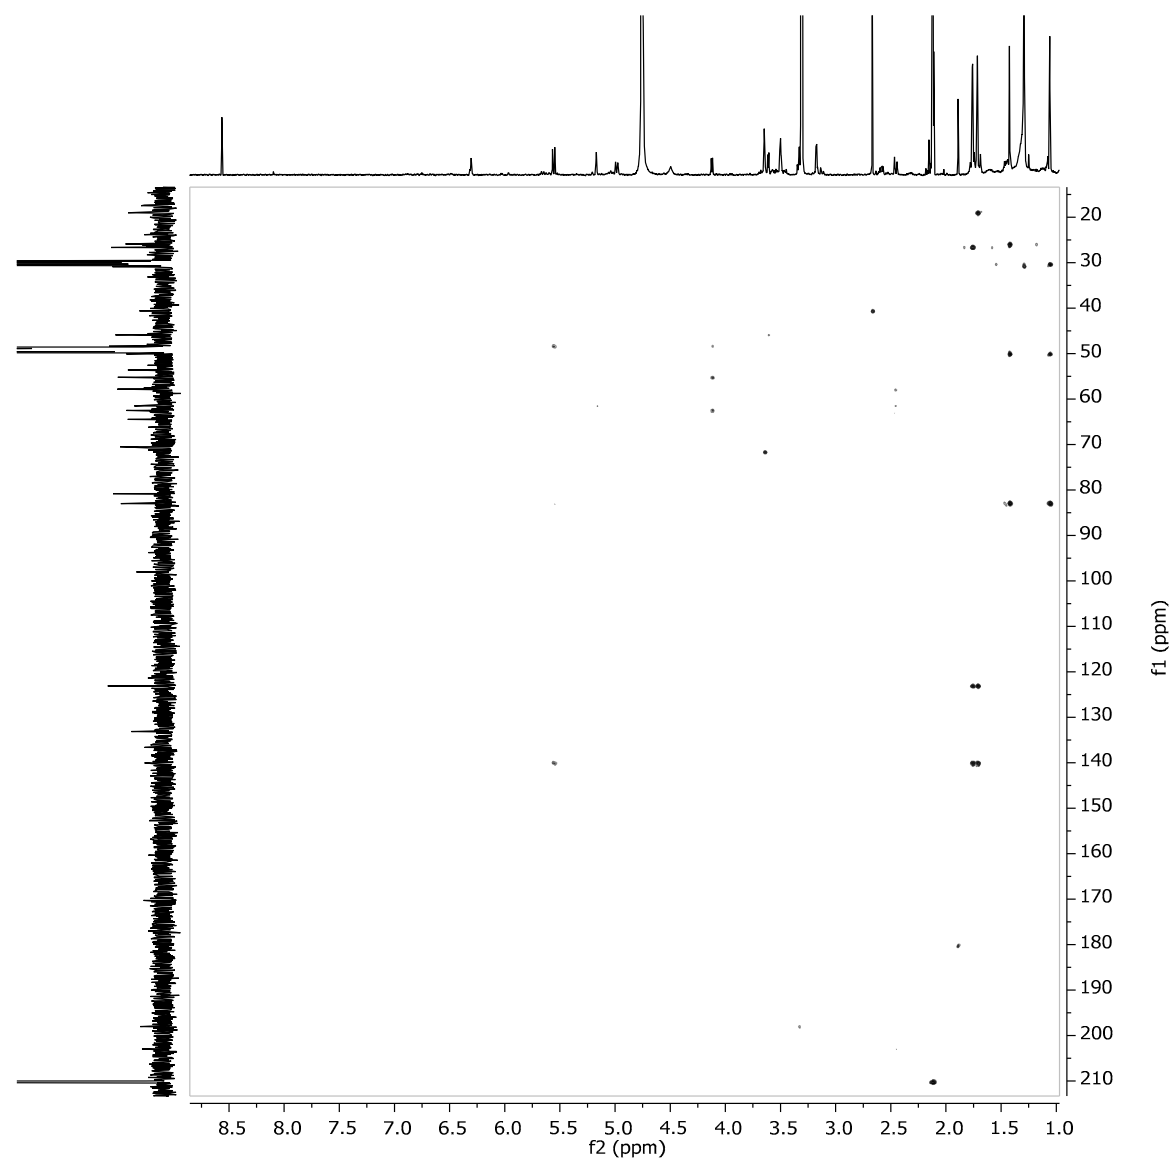

Figure S9. HMBC spectrum of **1** in methanol- $d_4$ :acetone- $d_6$  (3:1) at 500 MHz.

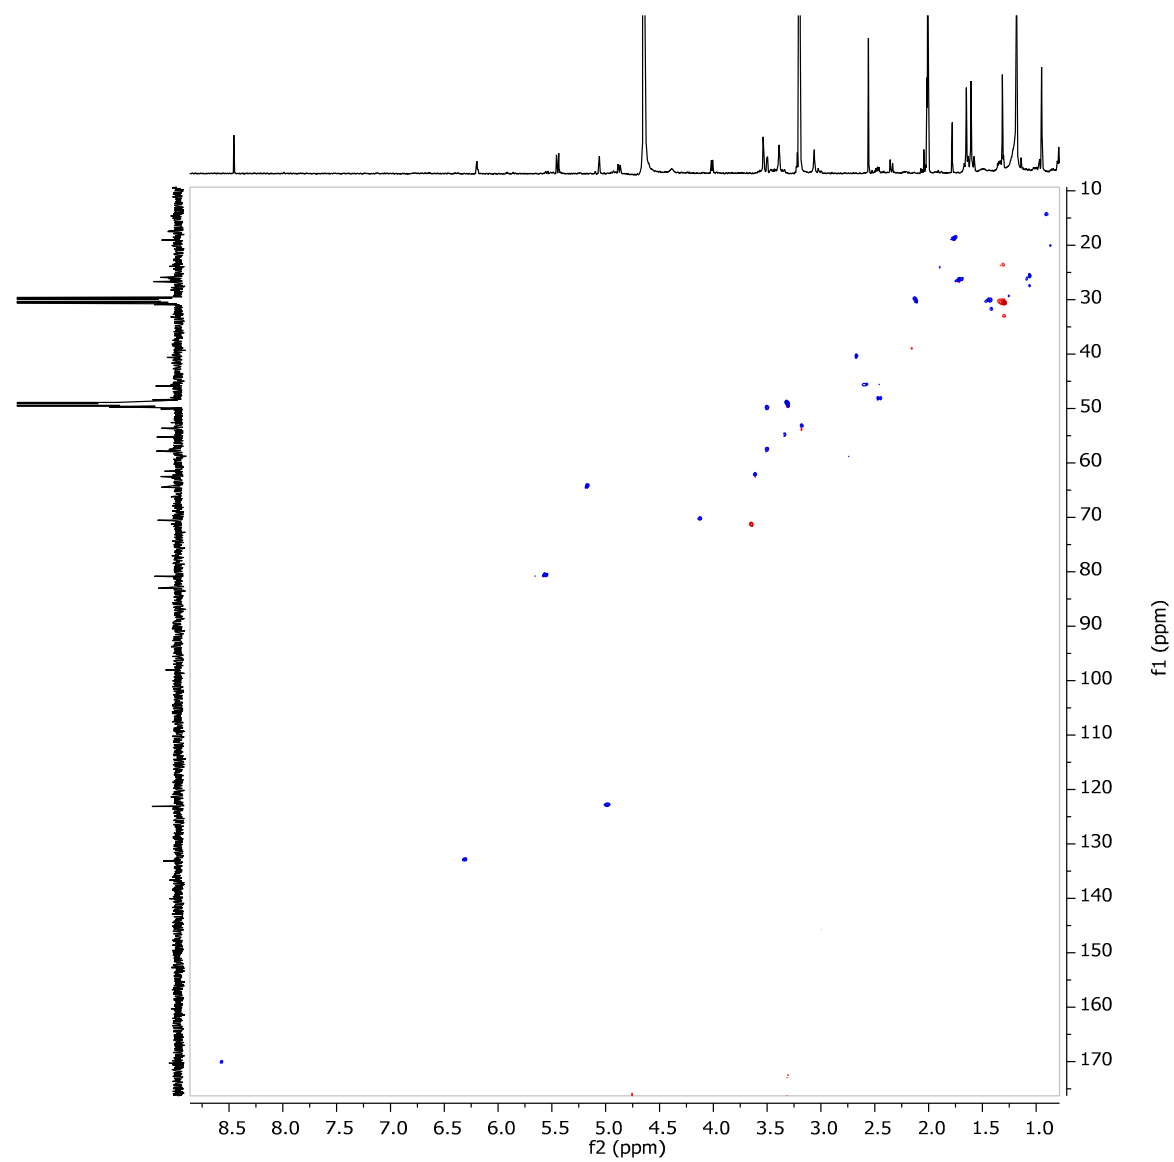

Figure S10. HSQC spectrum of **1** in methanol- $d_4$ :acetone- $d_6$  (3:1) at 500 MHz.

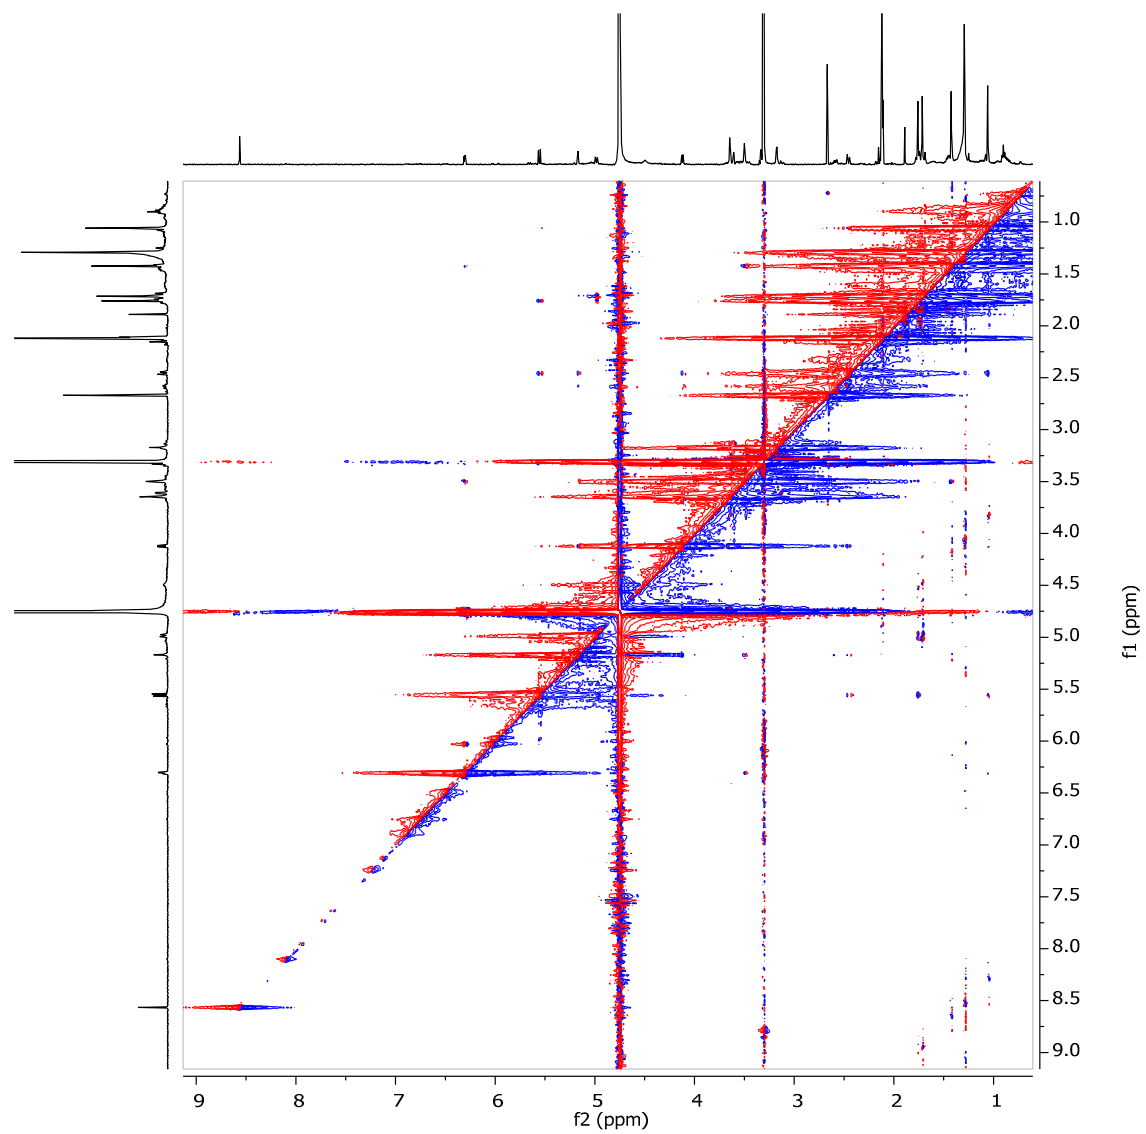

Figure S11. ROESY spectrum of **1** in methanol-*d*<sub>4</sub>:acetone-*d*<sub>6</sub> (3:1) at 500 MHz.

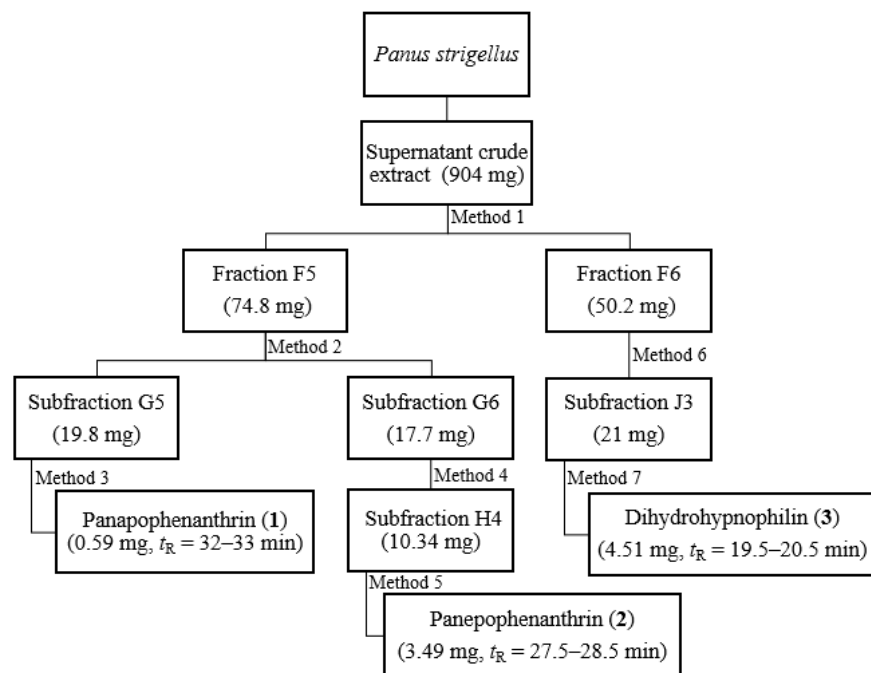

| Method | Column                                                                        | Flow rate<br>(mL/min) | Gradient elution<br>(B= MeCN with 0.1% Formic acid, up to 100% with A= H <sub>2</sub> O with 0.1 % Formic acid)                             |
|--------|-------------------------------------------------------------------------------|-----------------------|---------------------------------------------------------------------------------------------------------------------------------------------|
| 1      | Gemini® 10 µm C18 110 Å column (250 × 50 mm; Phenomenex, Torrance, CA, USA)   | 40                    | 5% B for 8 min, 5% B to 20% B in 5 min, 20% B to 30% B in 30 min, 30% B to 42 %B in 30 min, 42 % B to 100% B in 5 min, and 100% B for 5 min |
| 2      | Gemini® 10 µm C18 110 Å column (250 × 21.2 mm; Phenomenex, Torrance, CA, USA) | 20                    | 10% B for 5 min, 10% B to 20% B in 10 min, 20% B to 25% B in 20 min, 25% to 40% B in 15 min, 40% B to 100% B in 5 min, and 100% B for 5 min |
| 3      | Synergi™ 10 µm Polar-RP 80Åcolumn (250×50 mm; Phenomenex, Torrance, CA, USA)  | 20                    | 5% B for 3 min, 5% B to 15% B in 18 min, 15% B to 100% B in 25 min, and 100% B for 5 min                                                    |
| 4      | Synergi™ 10 µm Polar-RP 80Åcolumn (250×50 mm; Phenomenex, Torrance, CA, USA)  | 20                    | 5% B for 3 min, 5% B to 50% B in 25 min, 50% B to 100% B in 8 min, and 100% B for 3 min                                                     |
| 5      | Luna® 5 µm C18 110 Å column (250 × 21.2 mm; Phenomenex, Torrance, CA, USA)    | 15                    | 10% B for 3 min, 10% B to 25% B in 36 min, 25% B to 100% B in 3 min, and 100% B for 3 min                                                   |
| 6      | Gemini® 10 µm C18 110 Å column (250 × 21.2 mm; Phenomenex, Torrance, CA, USA) | 20                    | 25% B for 5 min, 25% B to 45% B in 20 min, 45% B to 100% B in 10 min, and 100% B for 5 min                                                  |
| 7      | XBridge 5 µm C18 column (250 × 19 mm; Waters, Milford, MA, USA)               | 20                    | 5% B for 3 minutes, 5% B to 20% B in 2 min, 20% B to 30% B in 30 min, 30% B to 100% B in 5 min, and 100% B for 3 min                        |

Figure S12. Flow chart of the purification procedure
